# Supplementary material for: Lacticaseibacillus rhamnosus Strain GG (LGG) Regulate Gut Microbial Metabolites, an In Vitro Study Using Three Mature Human Gut Microbial Cultures in a Simulator of Human Intestinal Microbial Ecosystem (SHIME)
Source: MDPI journal article supplement (doi:10.3390/foods12112105), 2023-05-24
Supplement: s1 [file s1]

# Transverse colon

Descending colon

## Tyramine

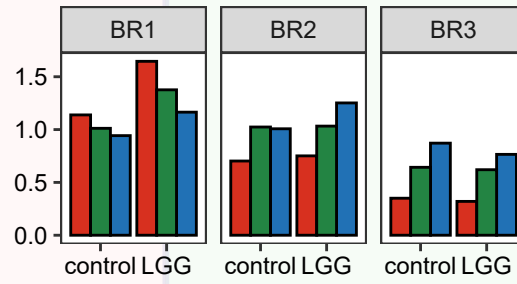

## p cresol sulfate

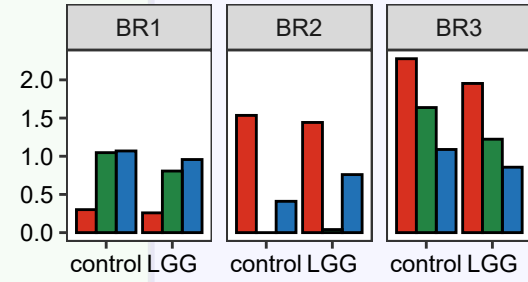

## Tyrosine

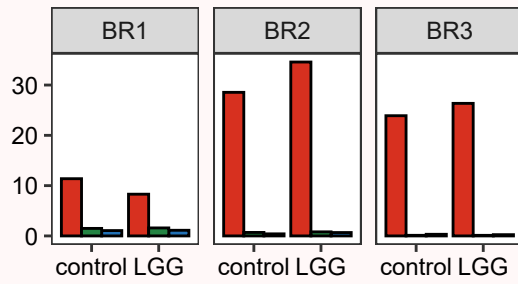

## 4-hydroxyphenylpyruvate

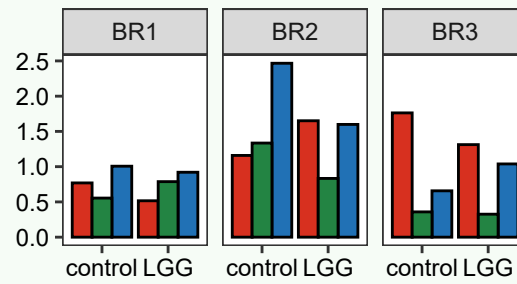

## p cresol

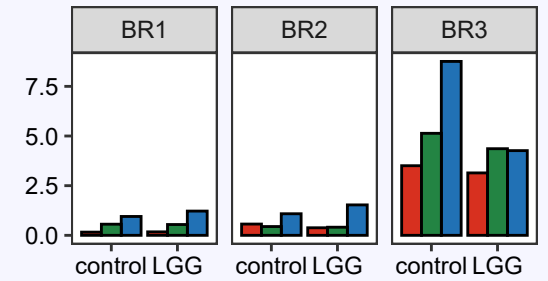

## 3-(4-hydroxyphenyl)lactate

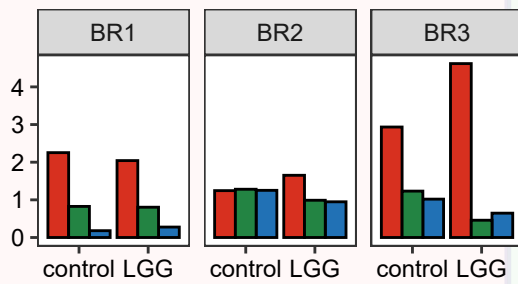

## 4-hydroxyphenylacetate

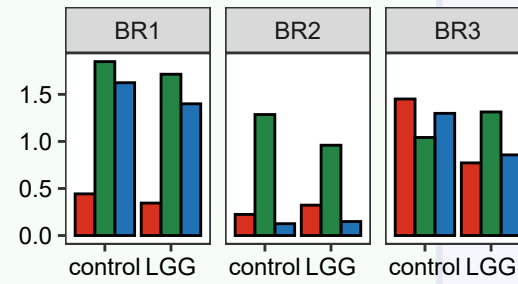

## 3-(4-hydroxyphenyl)acrylate

## 3-(4-hydroxyphenyl)propionate

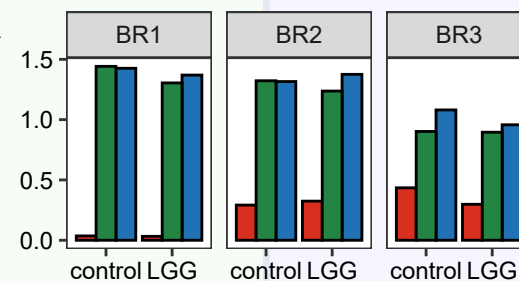

Ascending colon
