# Supplementary material for: Lacticaseibacillus rhamnosus Strain GG (LGG) Regulate Gut Microbial Metabolites, an In Vitro Study Using Three Mature Human Gut Microbial Cultures in a Simulator of Human Intestinal Microbial Ecosystem (SHIME)
Source: MDPI journal article supplement (doi:10.3390/foods12112105), 2023-05-24
Supplement: s1 [file s1]

Supplementary Table S1. Composition of Defined Medium

| Component       | Amount, g/L |
|-----------------|-------------|
| Arabinogalactan | 1.2         |
| Pectin          | 2.0         |
| Xylan           | 0.5         |
| Glucose         | 0.4         |
| Yeast Extract   | 3.0         |
| Special Pepton  | 1.0         |
| Mucin           | 2.0         |
| L-Cystein-HCl   | 0.5         |
| Starch          | 4.0         |
