# Supplementary material for: Lacticaseibacillus rhamnosus Strain GG (LGG) Regulate Gut Microbial Metabolites, an In Vitro Study Using Three Mature Human Gut Microbial Cultures in a Simulator of Human Intestinal Microbial Ecosystem (SHIME)
Source: MDPI journal article supplement (doi:10.3390/foods12112105), 2023-05-24
Supplement: s1 [file s1]

# Transverse colon

Descending colon

## Phenylethylamine

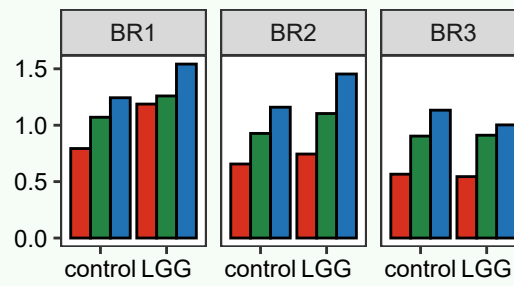

## phenylacetaldehyde

## Phenylacetate

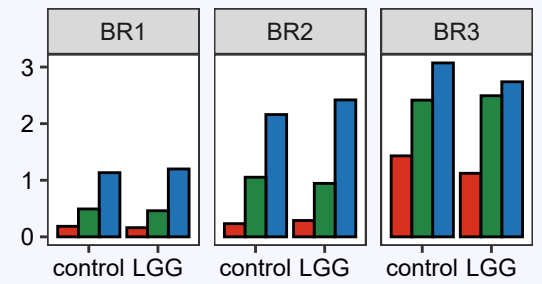

## Phenylpyruvate

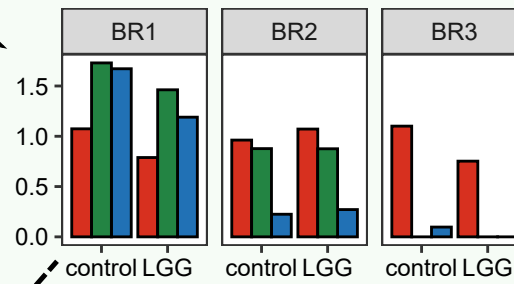

## 2-hydroxyphenylacetate

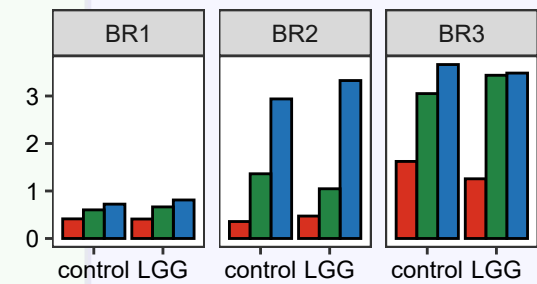

## Phenyllactate (PLA)

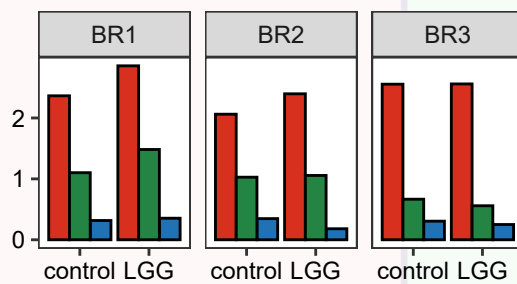

## 3-phenylpropionate (hydrocinnamate)

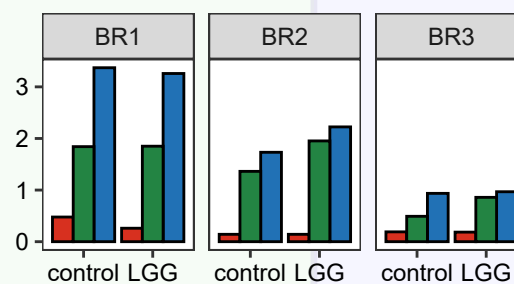

## Phenylacrylate

## Phenylalanine

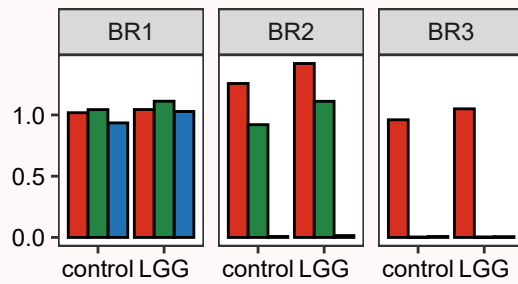

Ascending colon
