# Supplementary figures and images for: Lacticaseibacillus rhamnosus Strain GG (LGG) Regulate Gut Microbial Metabolites, an In Vitro Study Using Three Mature Human Gut Microbial Cultures in a Simulator of Human Intestinal Microbial Ecosystem (SHIME)
Source: MDPI journal article supplement (doi:10.3390/foods12112105), 2023-05-24

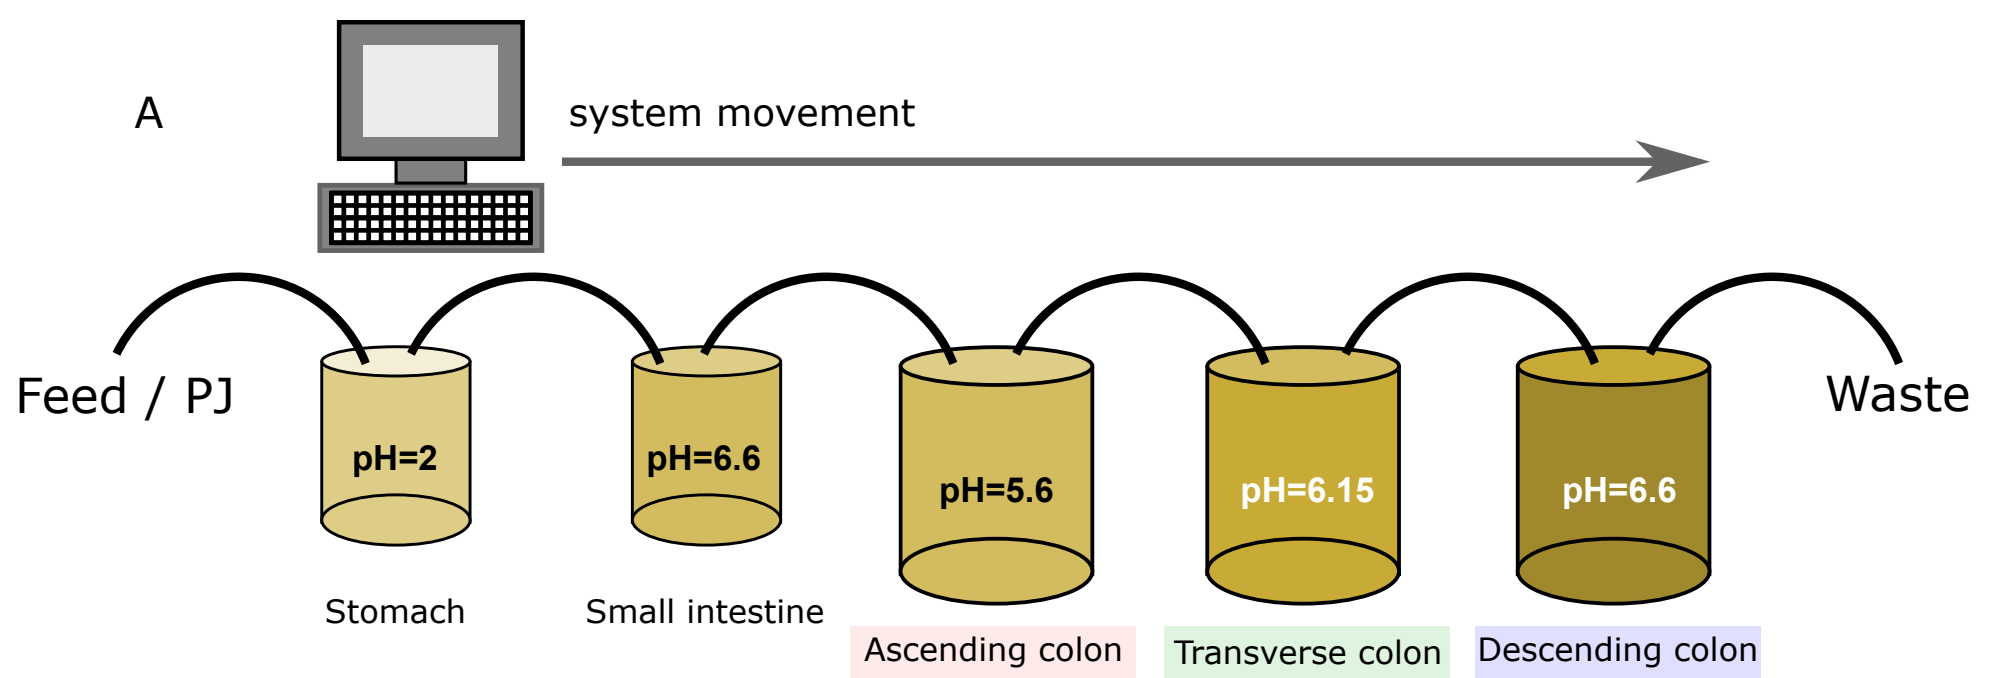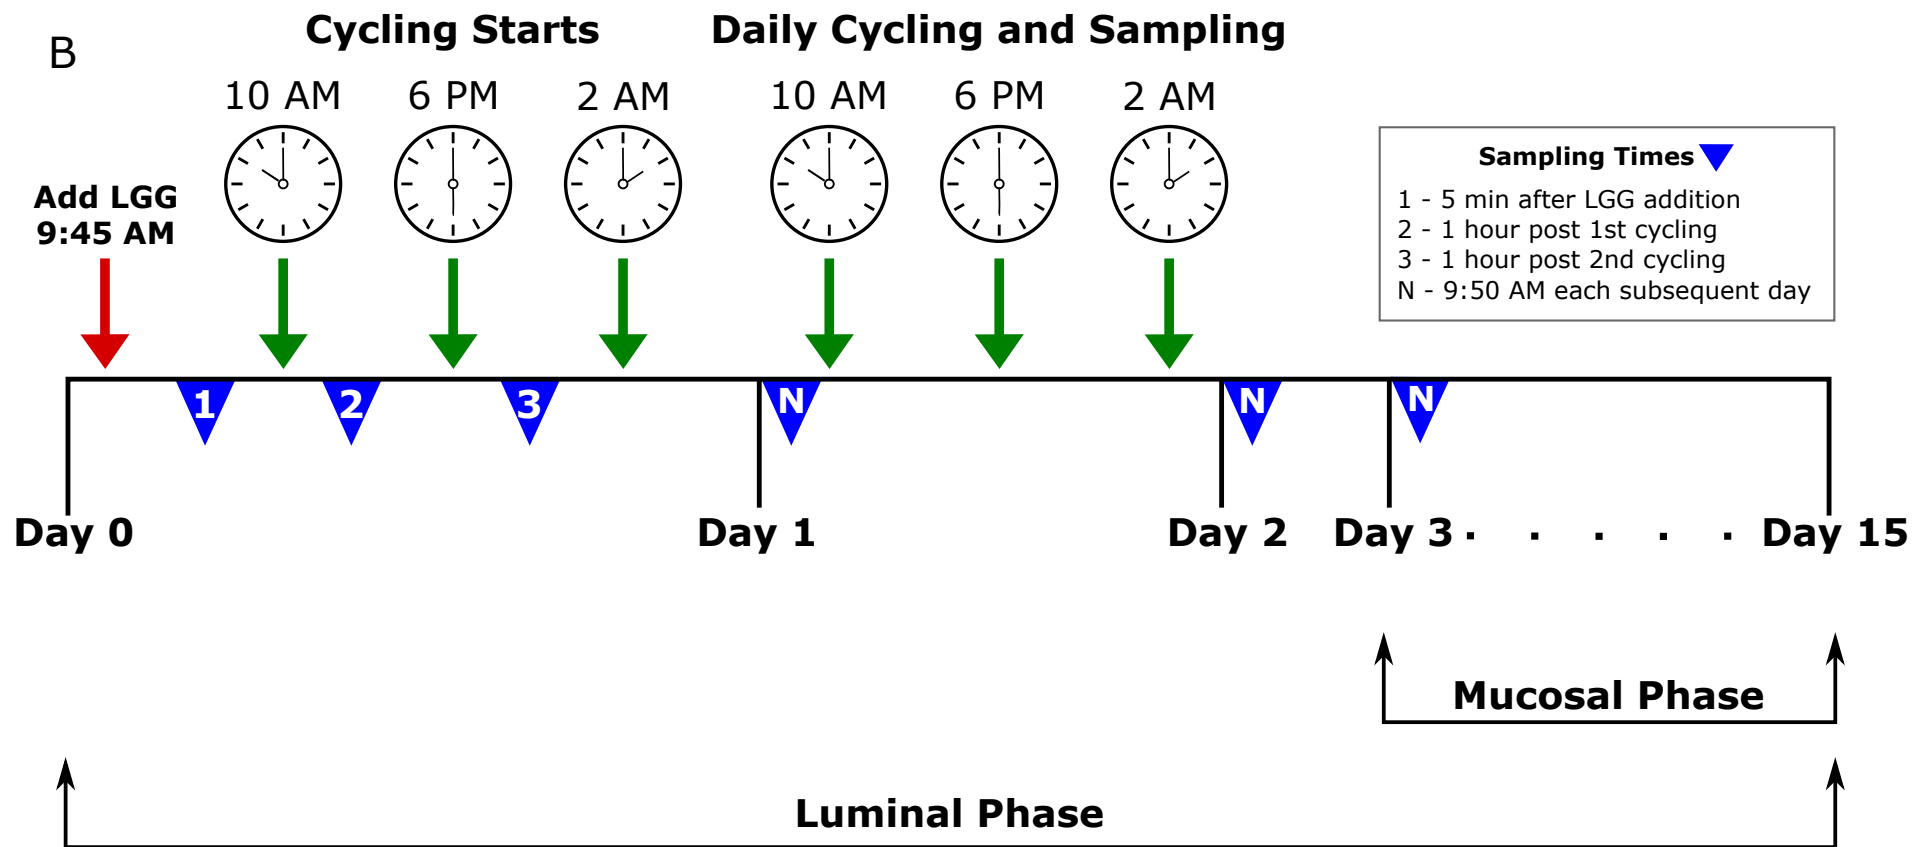

Supplement: s1 [file s1]

Number of reads mapped

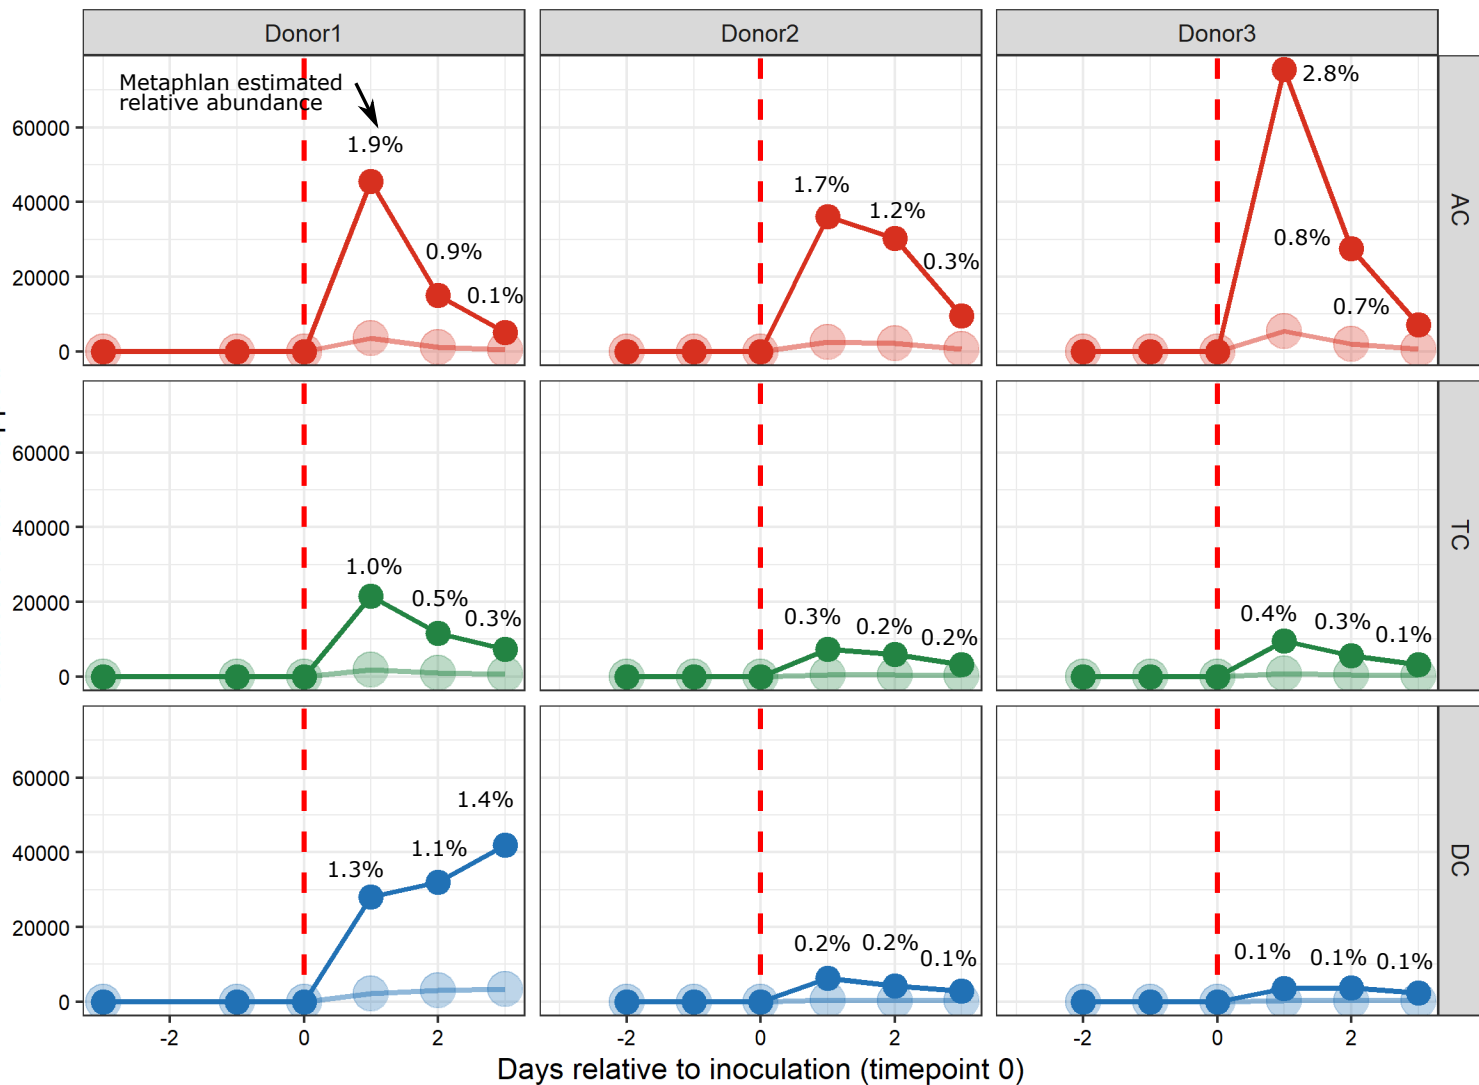

Supplement: s1 [file s1]
